# Supplementary material for: Involvement of Dendritic Cells and Th17 Cells in Induced Tertiary Lymphoid Structures in a Chronic Beryllium Disease Mouse Model
Source: Hindawi journal article supplement (doi:10.1155/2021/8845966), 2021-01-01

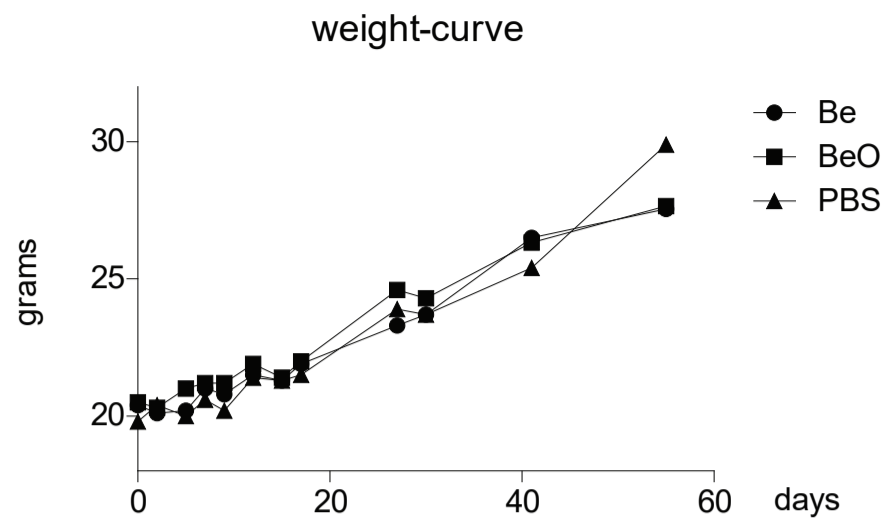

Supplement: f2 [file 8845966.f2.pdf]
